# Supplementary material
Source: MDPI journal article supplement (https://www.mdpi.com/2311-5629/7/4/79)
Supplement: s1 [file s1]

## Supplementary Information

# Premade Nanoparticle Films for the Synthesis of Vertically Aligned Carbon Nanotubes

Abdul Hoque <sup>1</sup>, Ahamed Ullah <sup>2</sup>, Beth S. Guiton <sup>2</sup> and Noe T. Alvarez <sup>1,\*</sup>

<sup>1</sup> Department of Chemistry, University of Cincinnati, Cincinnati, OH 45221, USA; hoqueml@mail.uc.edu

<sup>2</sup> Department of Chemistry, University of Kentucky, Lexington, KY 40506, USA; ahamed.ullah@uky.edu (A.U.); beth.guiton@uky.edu (B.S.G.)

\* Correspondence: noe.alvarez@uc.edu

**Table S1:** Current methods of premade catalyst nanoparticles assembly used for CNTs growth

| Catalyst composition                                        | Synthesis method             | Method of assembly   | Average size of catalyst (nm) | References            |
|-------------------------------------------------------------|------------------------------|----------------------|-------------------------------|-----------------------|
| AlFe <sub>2</sub> O <sub>4</sub>                            | Colloidal synthesis          | Evaporation          | 9.5 nm                        | [1]                   |
| Fe <sub>3</sub> O <sub>4</sub>                              | Wet-chemical synthesis       | Drop casting         | 20 nm                         | [2]                   |
| Fe <sub>3</sub> O <sub>4</sub> @SiO <sub>2</sub> core-shell | Thermal decomposition        | Langmuir-Blodgett    | 15 nm                         | [3]                   |
| Fe <sub>3</sub> O <sub>4</sub>                              | Wet-chemical synthesis       | Self-assembly        | 4.3 nm                        | [4]                   |
| <b>Fe-Mo</b>                                                | <b>Thermal decomposition</b> | <b>Spin coating</b>  | <b>3.2 nm</b>                 | <b>[5]</b>            |
| <b>Fe<sub>3</sub>O<sub>4</sub></b>                          | <b>Thermal decomposition</b> | <b>Self-assembly</b> | <b>9.3 nm</b>                 | <b>[This article]</b> |
| <b>FeO</b>                                                  | <b>Colloidal solution</b>    | <b>Dip coating</b>   | <b>-</b>                      | <b>[6]</b>            |
| <b>Co</b>                                                   | <b>Thermal decomposition</b> | <b>Spin coating</b>  | <b>8 nm</b>                   | <b>[7]</b>            |

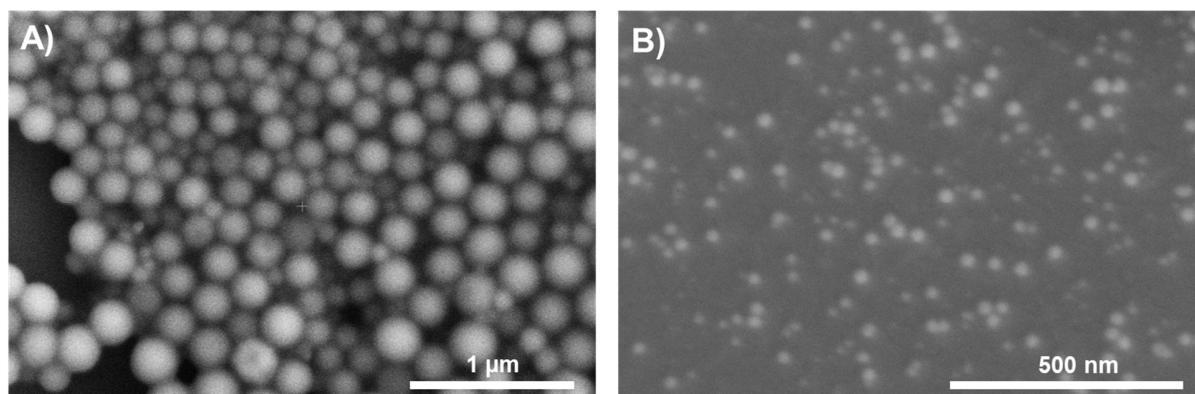

**Figure S1:** SEM images of spherical shaped aluminum oxide/hydroxide NPs. (A) Large size of aluminum oxide/hydroxide nanoparticles separated by centrifuge technique with 12000 rpm, (B) Small size of nanoparticles remained in decanted solution. A few drops of nanoparticle solution was drop cast onto a silicon wafer and annealed at 400 °C for an hour before characterization.

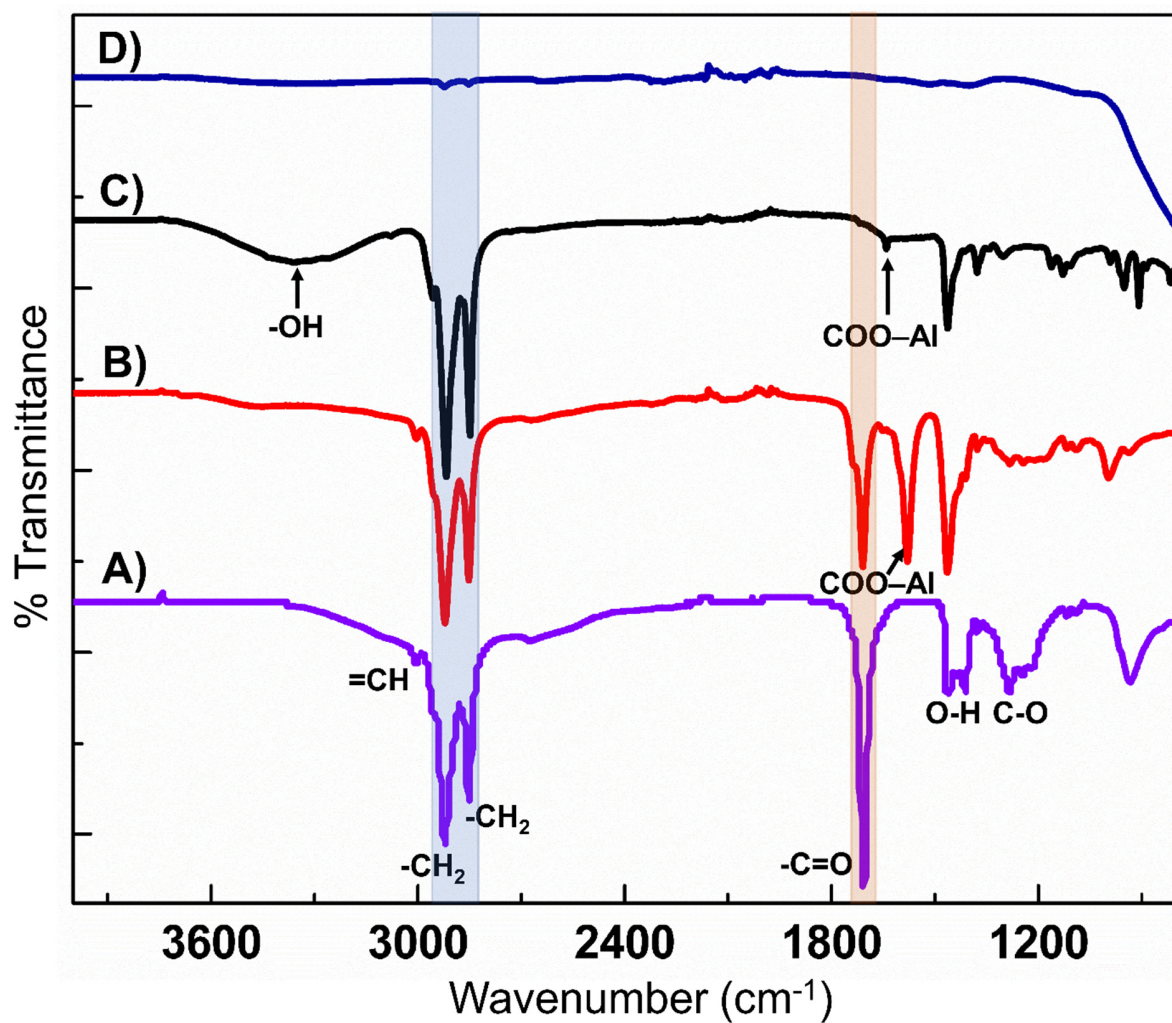

**Figure S2:** FTIR spectra of (A) pure oleic acid, (B) aluminum oleate, (C) aluminum oxide nanoparticles without annealing, and (D) aluminum oxide nanoparticles annealed at 700  $^{\circ}\text{C}$

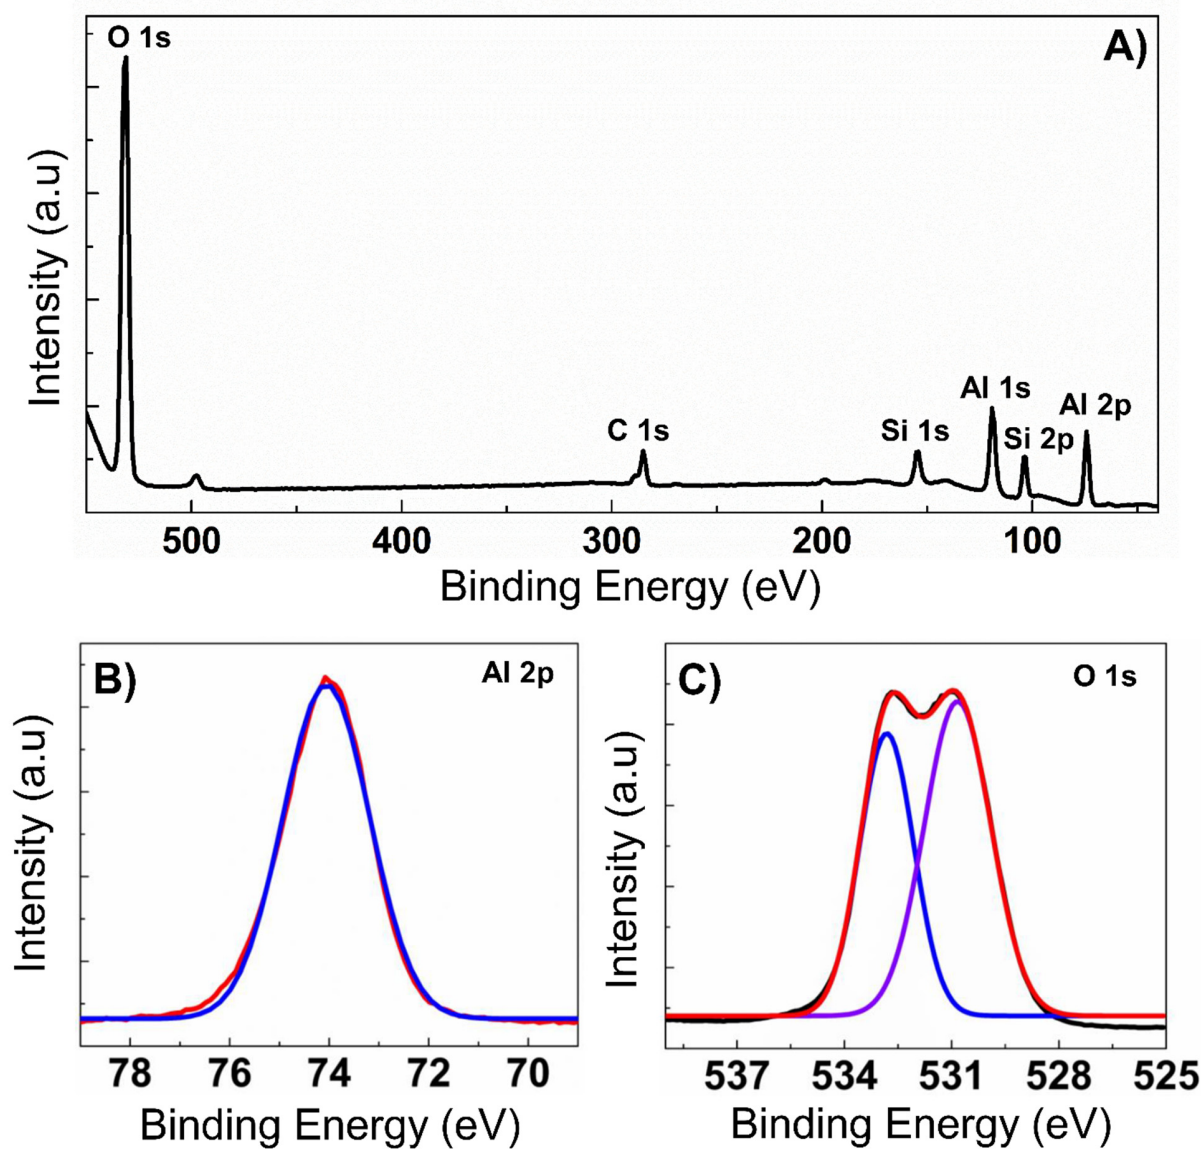

**Figure S3:** XPS spectra of aluminum oxide nanoparticles after annealing at 700 °C for 2 hours. (A) Survey spectra that represent all the core level peaks, (B) Al 2p, and (C) O 1s

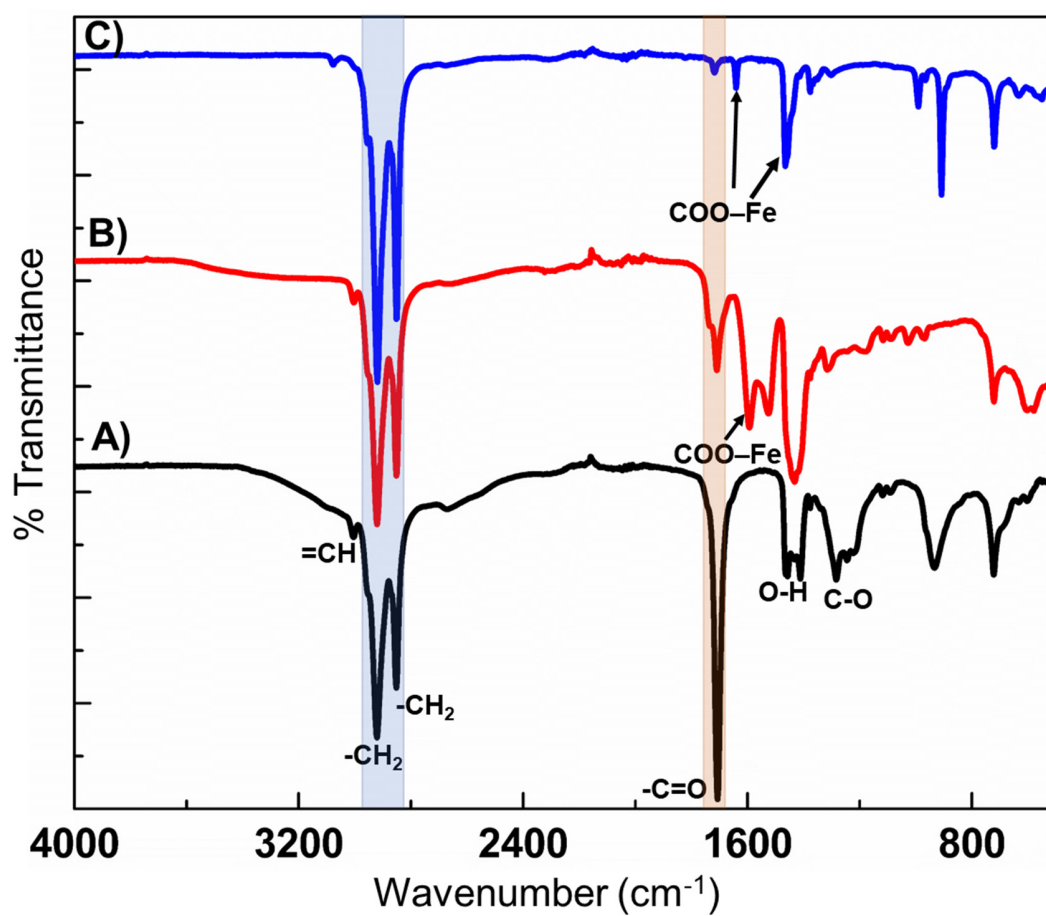

**Figure S4:** FTIR spectra of (A) pure oleic acid, (B) iron oleate, and (C) oleic acid coated iron oxide nanoparticles

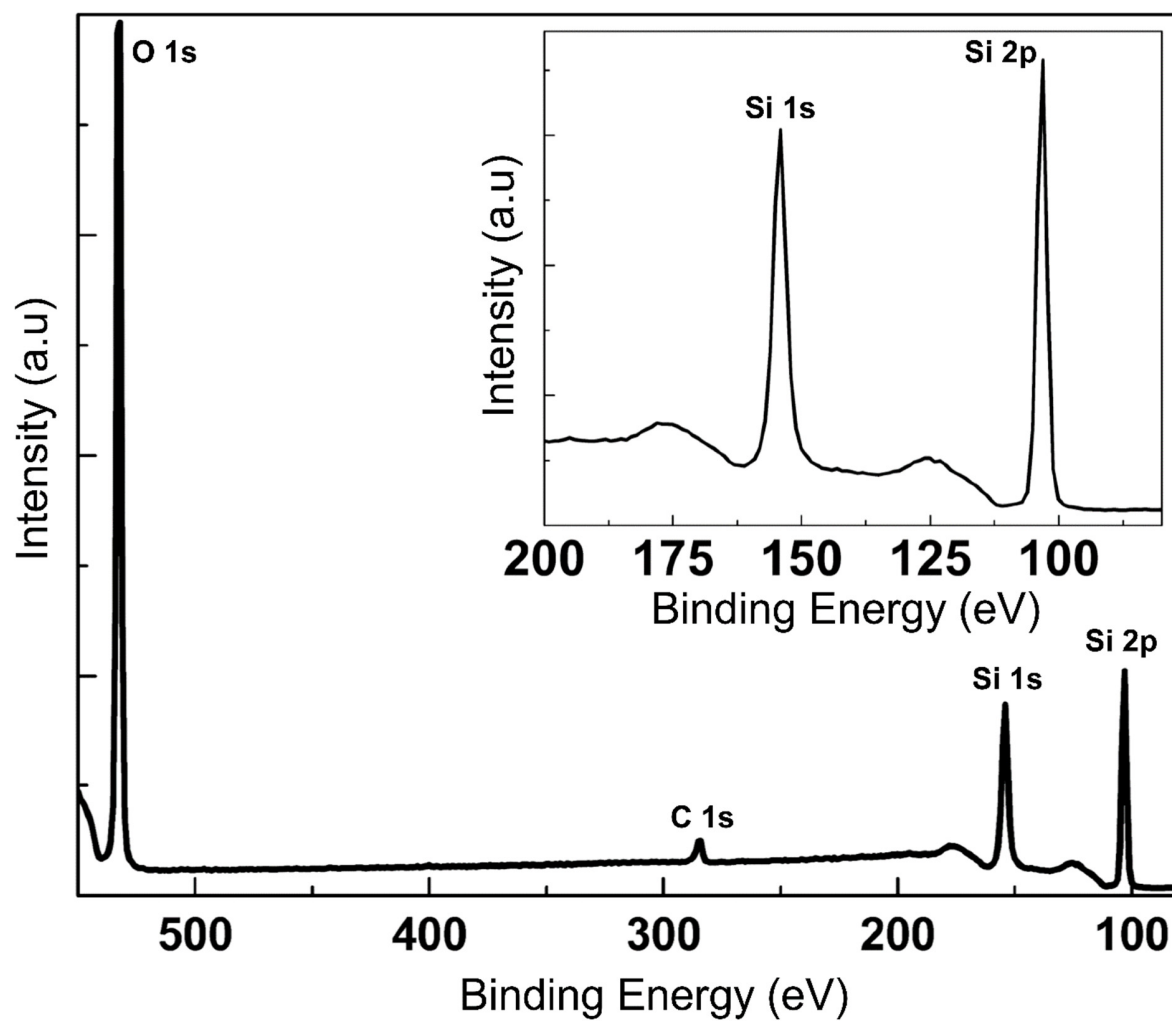

**Figure S5:** XPS survey spectra of blank silicon oxide substrate that show all the core level peaks

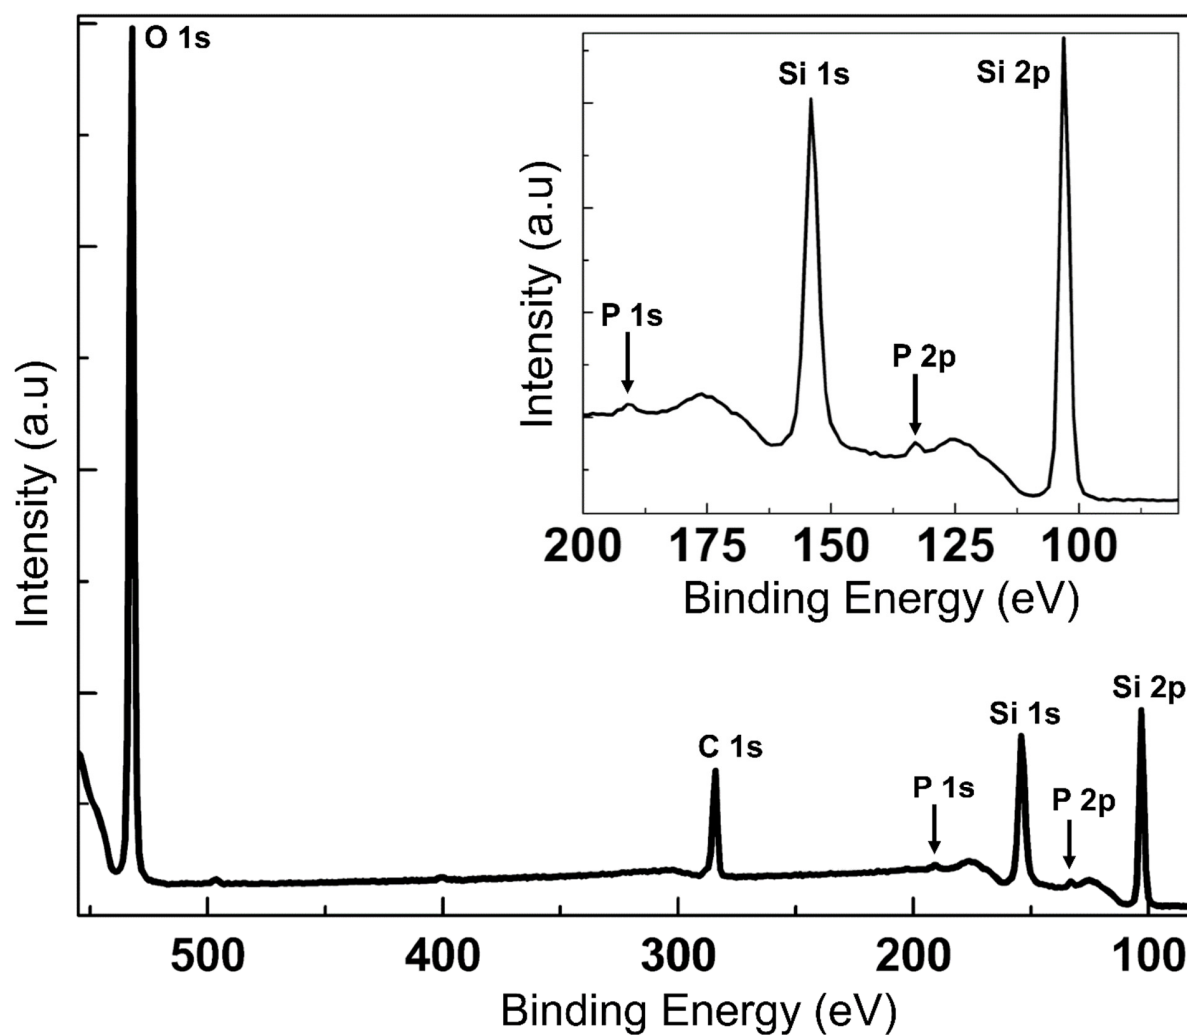

**Figure S6:** XPS survey spectra of 11-phosphonoundecanoic acid (PNDA) film on silicon substrate showing all core level peaks



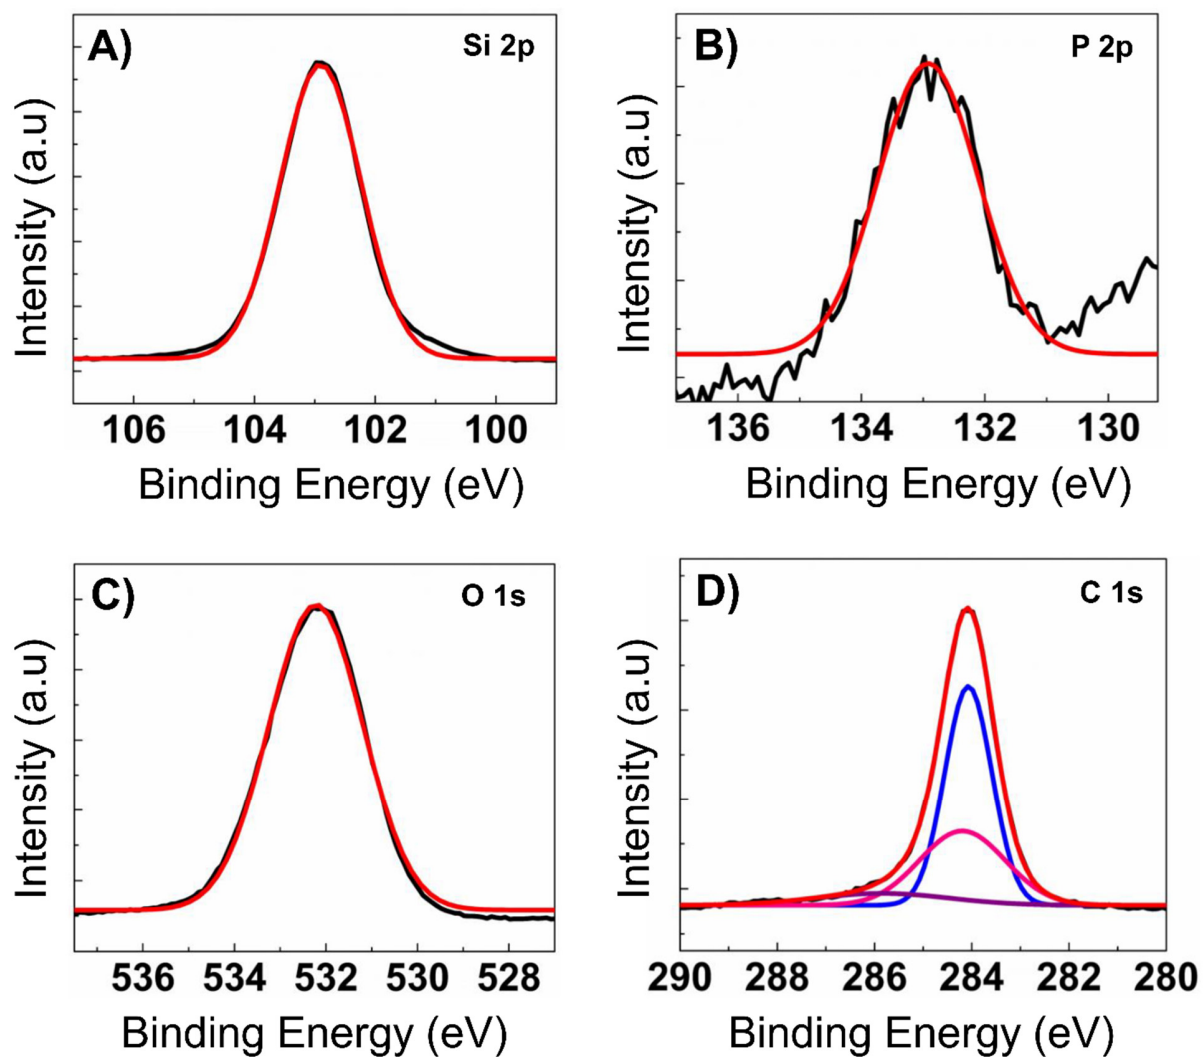

**Figure S7:** XPS spectra of PNDA attached silicon oxide substrate. (A) core level Si 2p peak, (B) core level P 2p peak, (C) core level O 1s peak, and (D) core level C 1s peak



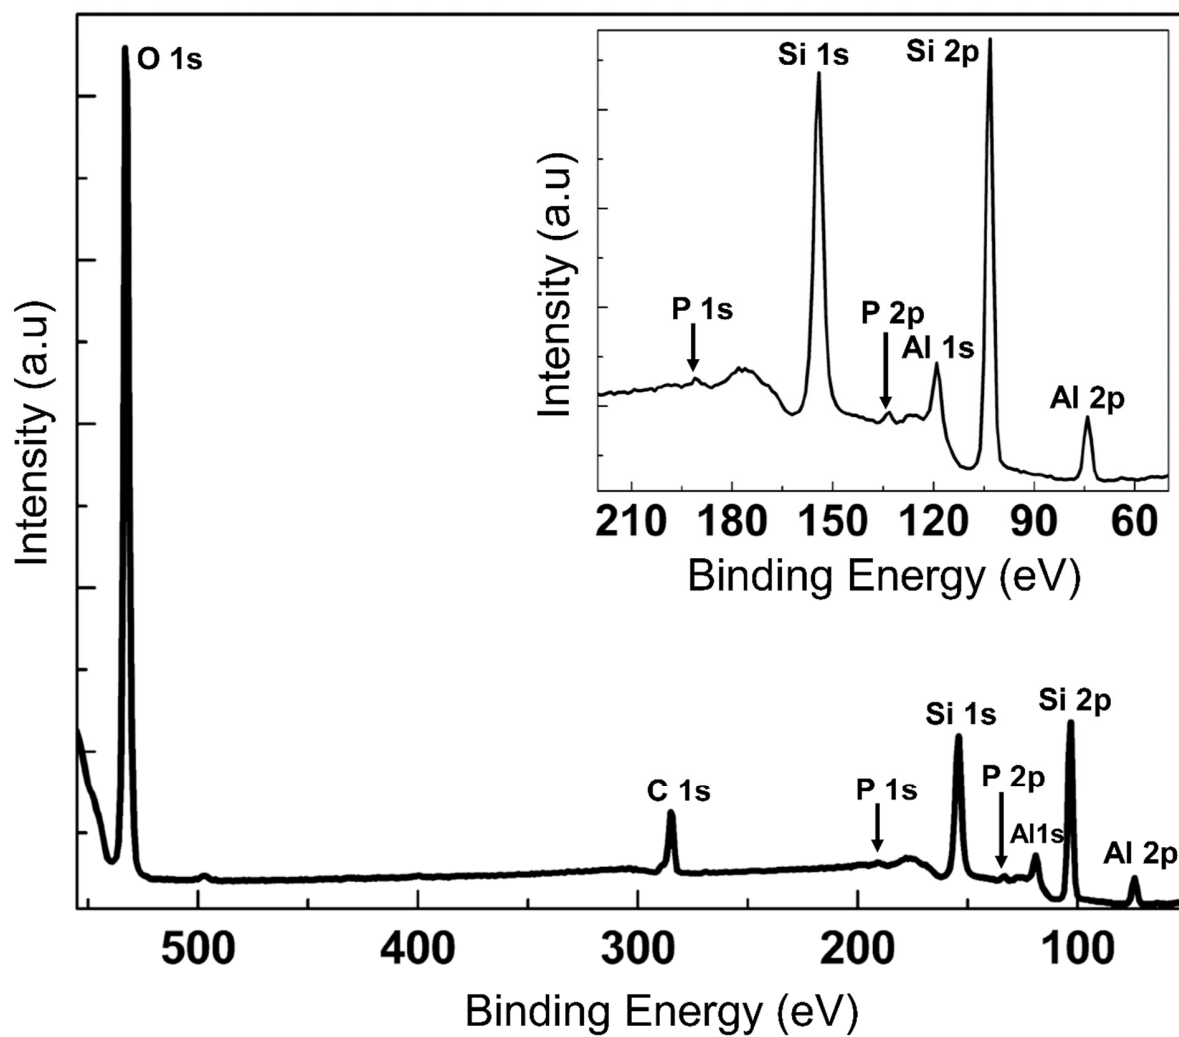

**Figure S8:** XPS survey spectra of 11-phosphonoundecanoic acid film on alumina monolayer showing all core level peaks

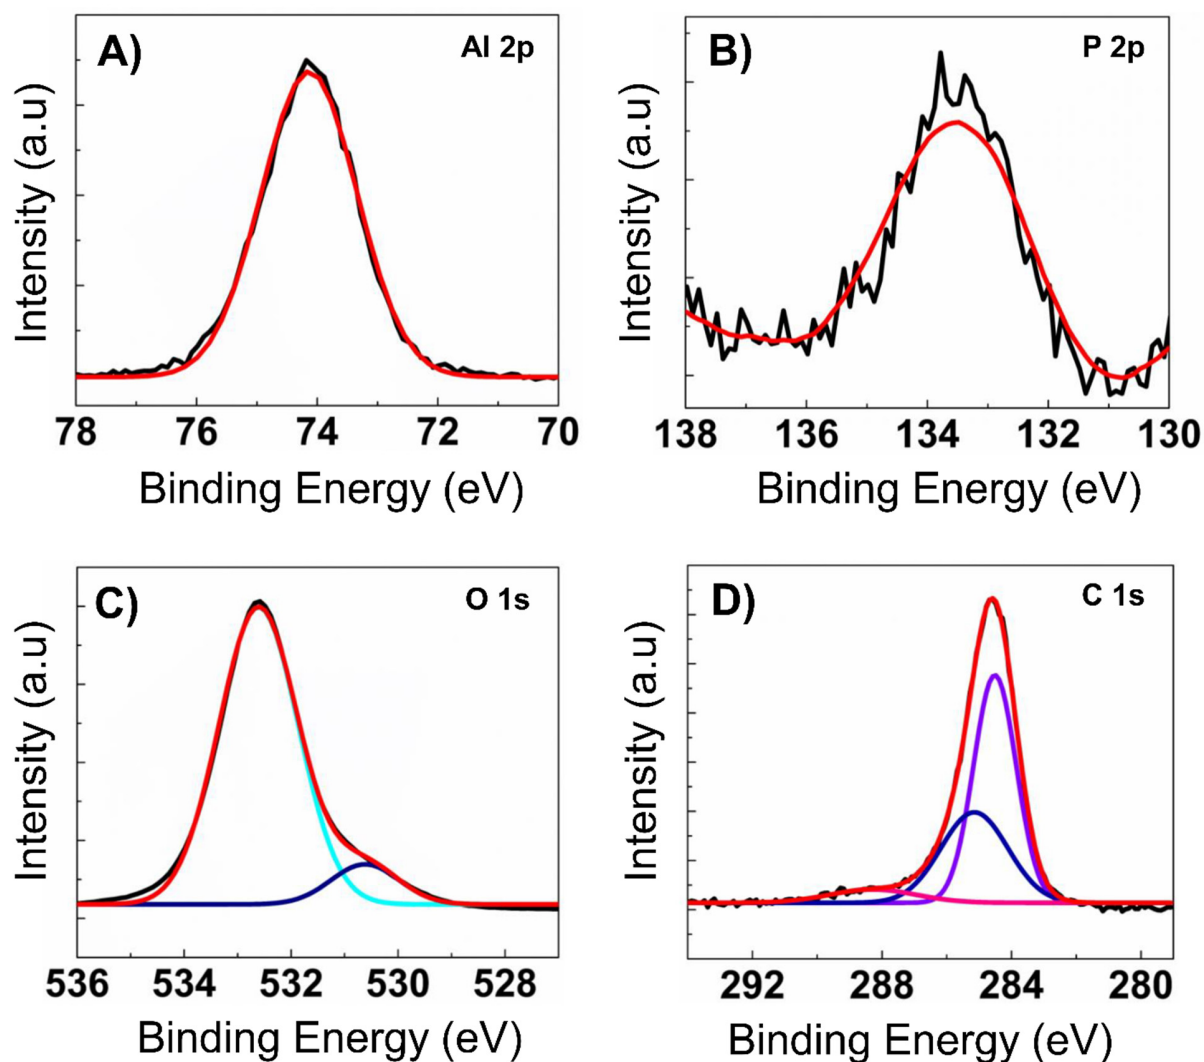

**Figure S9:** XPS spectra of PNDA attached aluminum oxide substrate. (A) core level Al 2p peak, (B) core level P 2p peak, (C) core level O 1s peak, and (D) core level C 1s peak

## References

- (1) Lee, S. S.; Zhang, C.; Lewicka, Z. A.; Cho, M.; Mayo, J. T. Control over the Diameter, Length, and Structure of Carbon Nanotube Carpets Using Aluminum Ferrite and Iron Oxide Nanocrystals as Catalyst Precursors. *ACS Nano* **2012**, 6, 1021-1030. <https://doi.org/10.1021/jp212404j>.
- (2) Wang, H.; Na, C. Synthesis of Millimeter-Long Vertically Aligned Carbon Nanotube Arrays on

Aluminum Oxide Buffer Prepared by Layer-by-Layer Assembly of Boehmite Nanoplates. *Carbon N. Y.* **2014**, 66 (2), 727–729. <https://doi.org/10.1016/j.carbon.2013.09.034>.

- (3) Ohashi, M.; Sugawara, T.; Kawasaki, K.; Kushida, M. Synthesis and Diameter Control of Vertically-Aligned Carbon Nanotube Growth from Langmuir – Blodgett Films Deposited Fe<sub>3</sub>O<sub>4</sub> @ SiO<sub>2</sub> Core – Shell Nanoparticles. *Jpn. J. Appl. Phys.* **2014**, 53 (02BD09), 1–5. <https://doi.org/https://iopscience.iop.org/article/10.7567/JJAP.53.02BD09/meta>.
- (4) Alvarez, N. T.; Orbaek, A.; Barron, A. R.; Tour, J. M.; Hauge, R. H. Dendrimer-Assisted Self-Assembled Monolayer of Iron Nanoparticles for Vertical Array Carbon Nanotube Growth. *ACS Appl. Mater. Interfaces* **2010**, 2 (1), 15–18. <https://doi.org/10.1021/am900666w>.
- (5) Nishino, H.; Yasuda, S.; Namai, T.; Futaba, D. N.; Yamada, T.; Yumura, M.; Iijima, S.; Hata, K. Water-Assisted Highly Efficient Synthesis of Single-Walled Carbon Nanotubes Forests from Colloidal Nanoparticle Catalysts. *J. Phys. Chem. C* **2007**, 111 (48), 17961–17965. <https://doi.org/10.1021/jp0723719>.
- (6) Roussey, A.; Venier, N.; Fneich, H.; Giardella, L.; Pinaud, T.; Tahir, S.; Pelaez-Fernandez, M.; Arenal, R.; Mehdi, A.; Jourdain, V. One-Pot Preparation of Iron/Alumina Catalyst for the Efficient Growth of Vertically-Aligned Carbon Nanotube Forests. *Mater. Sci. Eng. B Solid-State Mater. Adv. Technol.* **2019**, 245 (August 2018), 37–46. <https://doi.org/10.1016/j.mseb.2019.05.005>.
- (7) Huh, Y.; Green, M. L. H.; Kim, Y. H.; Lee, J. Y.; Lee, C. J. Control of Carbon Nanotube Growth Using Cobalt Nanoparticles as Catalyst. *Appl. Surf. Sci.* **2005**, 249 (1–4), 145–150. <https://doi.org/10.1016/j.apsusc.2004.11.059>.
